# Supplementary material for: Evaluation of health benefits and harms of the breast cancer screening programme in the Basque Country using discrete event simulation
Source: Springer Nature journal article supplement (doi:10.1186/s12885-015-1700-4), 2015-10-12

## **Model inputs, calibration and validation**

Three main parameters were calibrated: time between consecutive invitations, age distribution of preclinical phase onset and its mean duration. We obtained the best fitting parameters to include in the final model by following the seven-step approach for calibrating models by Karnon et al. [26].

First, we calibrated the time between intervals considering that it was not influenced by other unobserved parameters. At the beginning, we used a random search algorithm considering different values from a normal distribution centred in 2 years and standard deviation 0.5. Based on these results, we continued using a grid search algorithm, running 25 simulations for 10 different values between 2.11 and 2.20. The goodness-of-fit measure applied to assess the difference between observed and expected outcomes was the chi-square statistic. The overall chi-square statistic of each hypothesis was calculated as the sum of the chi-square statistics calculated for the analysed years. We assumed outcomes for each year were independent. We included in the model the parameter value for which the overall chi-square statistic was the minimum: 2.18 year between consecutive invitations (Figure S1).

Afterwards, we calibrated jointly two factors. The first one will be the relative risk (RR) for the incidence function. The second multiplier will be used to calibrate the mean value for the preclinical state duration which prior estimate was 4.0. Thus we will calibrate the factor  $t$  to obtain a final mean preclinical state duration  $4t$ . We considered as target outputs the number of screening-detected cancers from 1996-2011, together with total cancer detection rates by age group (50-54, 55-59, 60-64, 65-69) for the period 1999-2009. Random search algorithm was used also in this case considering Normal(1,0.25) distribution for both factors for a first approximation and a grid search algorithm centred in  $0.87 \leq RR \leq 0.90$  and  $0.85 \leq t \leq 0.90$ . The goodness-of-fit measure used in this case was also the chi-square statistic, and we defined the overall chi-square as the sum of the measures calculated for each target output using the same weight for all five outputs. We included in the model the parameter set for which the overall chi-square statistic was the minimum. The final relative risk used for BC incidence functions was 0.88, and the mean time in preclinical state 3.44 years ( $t = 0.86$ ) (Figure S2).

For model validation, we compared the estimated results for the screened population (multi-cohort model) with the observed indicators from BCSPBC and the Basque cancer registries such as number of

invited women, number of mammograms carried out in the programme, age-specific breast cancer incidence or the number of women with a positive mammography result (Figure S3). We also confirmed that life expectancy for women from the general population and women who died from BC was concordant with the observed data (Table S5).

Table S1: Model input and validation parameters

| Input data                                     | Source                    |
|------------------------------------------------|---------------------------|
| Invited population                             |                           |
| Number of women invited for the first time     | Screening programme data  |
| Age distribution                               | Screening programme data  |
| Participation rate                             | Screening programme data  |
| Time until event                               |                           |
| Other cause mortality                          | Basque mortality registry |
| Breast cancer mortality                        | Basque mortality registry |
| Time till pre-clinical state                   | Rue et al, 2009           |
| Pre-clinical state duration                    | Lee and Zelen, 2006       |
| Age- and stage-specific breast cancer survival | VilaprinYO et al.         |
| Detection data                                 |                           |
| Clinically detected cancer stage distribution  | Basque cancer registry    |
| Programme sensitivity and specificity          | Screening programme data  |
| Screen detected cancer stage distribution      | Screening programme data  |
| Validation data                                | Source                    |
| Invited population                             |                           |
| Total number of invited women                  | Screening programme data  |
| Total number of mammograms                     | Screening programme data  |
| Recall rate                                    | Screening programme data  |
| Remitted for additional test                   | Screening programme data  |
| Detection data                                 |                           |
| Age- and year-specific breast cancer incidence | Basque cancer registry    |
| Screening-detected cancers                     | Screening programme data  |

Table S2: Number of women invited into the breast cancer screening programme in the Basque Country and participation rates (%).

| Year | First invitations |               | Successive invitation |               |
|------|-------------------|---------------|-----------------------|---------------|
|      | Number of women   | Participation | Number of women       | Participation |
| 1996 | 7,835             | 79.71         | 0                     | -             |
| 1997 | 67,719            | 72.94         | 0                     | -             |
| 1998 | 87,967            | 78.26         | 16,702                | 71.49         |
| 1999 | 41,841            | 84.60         | 51,037                | 64.57         |
| 2000 | 17,426            | 96.27         | 80,399                | 74.77         |
| 2001 | 18,902            | 90.45         | 86,792                | 70.82         |
| 2002 | 16,401            | 90.04         | 86,110                | 74.54         |
| 2003 | 21,109            | 84.38         | 87,877                | 74.59         |
| 2004 | 16,363            | 87.26         | 86,327                | 75.08         |
| 2005 | 14,043            | 89.49         | 91,996                | 75.35         |
| 2006 | 16,804            | 86.39         | 114,691               | 73.97         |
| 2007 | 17,018            | 87.92         | 105,850               | 75.18         |
| 2008 | 17,847            | 83.85         | 110,542               | 75.15         |
| 2009 | 18,510            | 85.68         | 116,330               | 75.51         |
| 2010 | 17,711            | 88.48         | 120,481               | 79.45         |
| 2011 | 16,545            | 91.21         | 128,836               | 79.49         |

Table S3: Distribution of breast cancer detection stages.

| Detection stage                      | In situ | Stage I | Stage IIa | Stage IIb | Stage III | Stage IV |
|--------------------------------------|---------|---------|-----------|-----------|-----------|----------|
| Clinically detected cancer (in 1995) |         |         |           |           |           |          |
| 50-59                                | 10.00   | 32.63   | 24.75     | 15.75     | 9.00      | 7.88     |
| 60-69                                | 7.42    | 21.72   | 22.86     | 26.29     | 13.72     | 8.00     |
| >69                                  | 4.35    | 12.11   | 27.85     | 12.11     | 24.22     | 19.37    |
| Screen detected cancer               |         |         |           |           |           |          |
| Period 1996-1999                     |         |         |           |           |           |          |
| 50-59                                | 19.69   | 49.71   | 19.30     | 7.60      | 3.12      | 0.58     |
| 60-69                                | 17.94   | 50.93   | 19.18     | 6.80      | 4.12      | 1.03     |
| Period 2000-2005                     |         |         |           |           |           |          |
| 50-59                                | 18.77   | 49.16   | 20.34     | 6.39      | 4.65      | 0.70     |
| 60-69                                | 18.08   | 57.18   | 15.60     | 5.33      | 3.43      | 0.38     |
| Period 2006-2008                     |         |         |           |           |           |          |
| 50-59                                | 18.77   | 49.16   | 20.34     | 6.39      | 4.65      | 0.70     |
| 60-69                                | 18.08   | 57.18   | 15.60     | 5.33      | 3.43      | 0.38     |
| Period 2009-2011                     |         |         |           |           |           |          |
| 50-59                                | 18.76   | 49.47   | 21.18     | 4.99      | 4.54      | 1.06     |
| 60-69                                | 15.55   | 54.50   | 19.97     | 5.56      | 3.93      | 0.49     |

Table S4: Sensitivity and specificity of the breast cancer screening programme.

| Year        | 1996-1999 | 2000-2005 | 2006-2008 | 2009-2011 |
|-------------|-----------|-----------|-----------|-----------|
| Sensitivity | 95.20     | 83.40     | 83.52     | 85.86     |
| Specificity | 90.44     | 90.61     | 93.67     | 94.13     |

Table S5: Validation of the mean life expectancy for women in the general population and median survival time corrected by lead time for women with death from BC.

|                    | Theoretical* | Estimated |
|--------------------|--------------|-----------|
| General population | 83.70        | 82.61     |
| BC death survival  |              |           |
| Stage I            | 9.03         | 6.34      |
| Stage IIa          | 6.46         | 4.77      |
| Stage IIb          | 5.14         | 4.19      |
| Stage III          | 3.41         | 2.74      |
| Stage IV           | 0.80         | 0.63      |

\*Median BC survival times when no other cause deaths occur are shown as theoretical. Estimated median survival times for BC deaths are lower than theoretical as women with greater BC survival time die from other causes.

BC = breast cancer

Figure S1: Total number of women invited to join the programme and the number of the mammograms carried out.

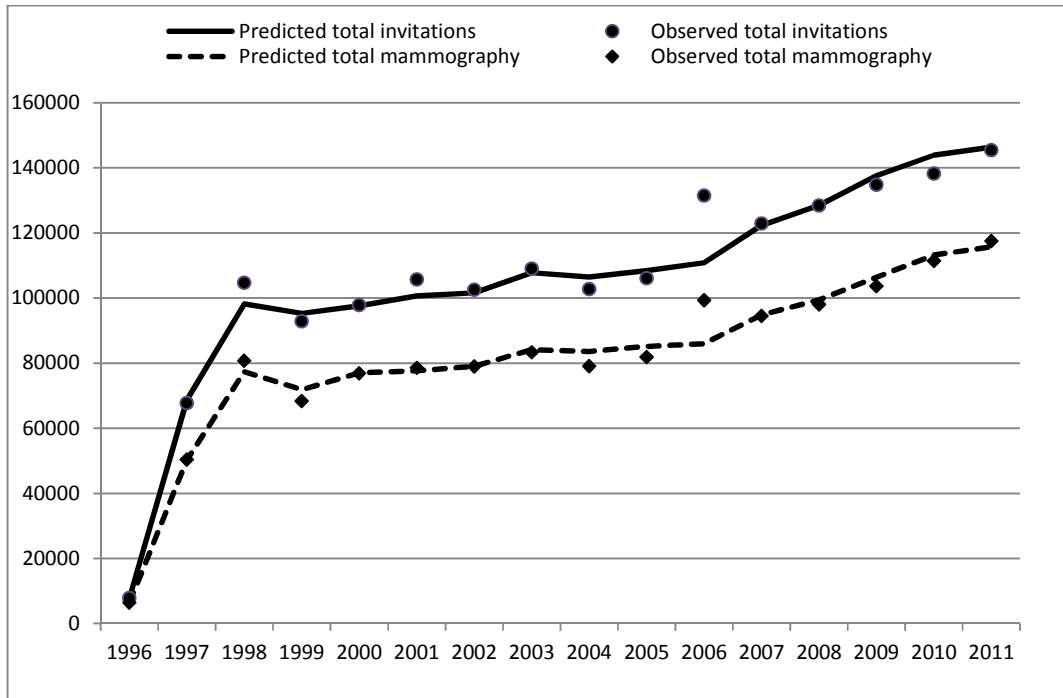



Figure S2: Breast cancer incidence by age group (implementation period 1996-1999 excluded).

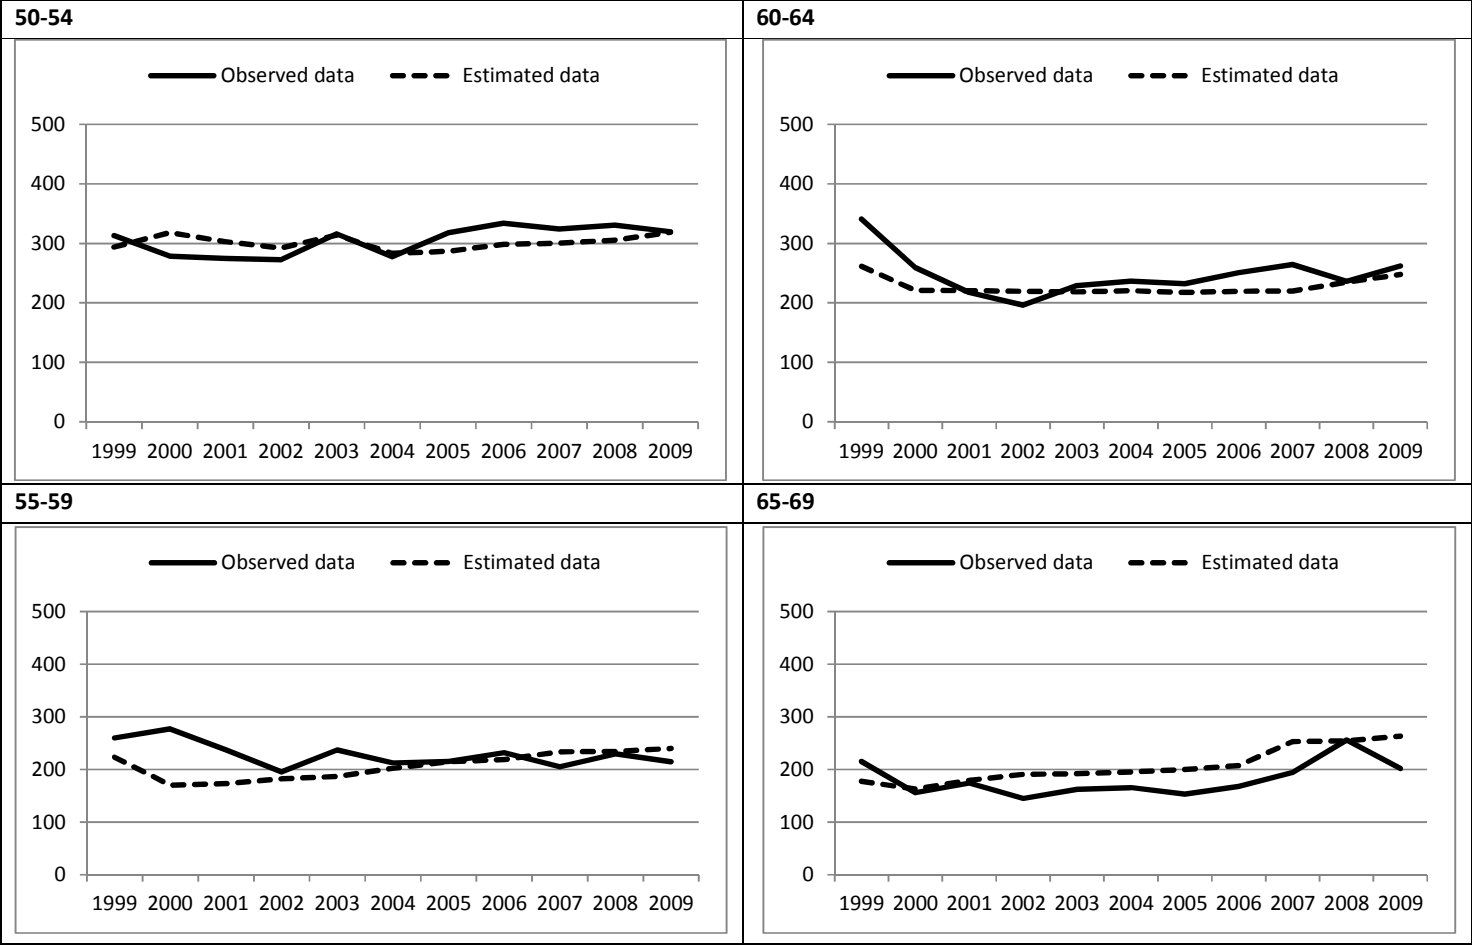

Figure S3: Total number of positive mammogram results in the breast cancer screening programme.

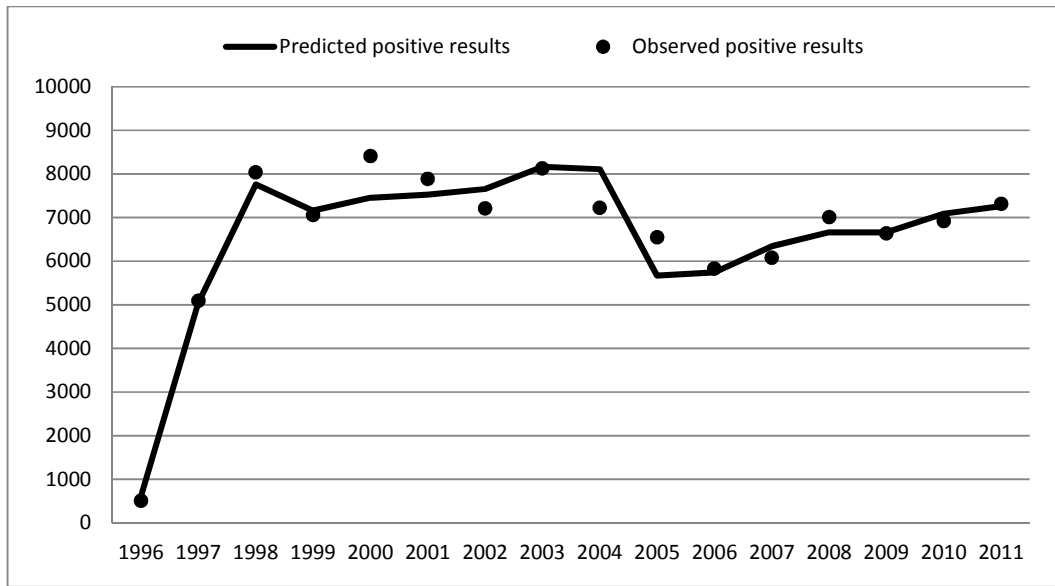

Supplement: MOESM1 [file 9745182]
